# Supplementary material for: Tunable luminescence and energy transfer properties of Bi3+ and Mn4+ co-doped Ca14Al10Zn6O35 phosphors for agricultural applications
Source: Royal Society of Chemistry journal article supplement (doi:10.1039/c7ra01285c), 2017-01-01
Supplement: c7ra01285c1.pdf [file c7ra01285c1.pdf]

# Tunable luminescence and energy transfer properties of Bi<sup>3+</sup> and Mn<sup>4+</sup> co-doped

## Ca<sub>14</sub>Al<sub>10</sub>Zn<sub>6</sub>O<sub>35</sub> phosphors for agricultural applications

Li Li, Yuexiao Pan, \* Zhen Chen, Shaoming Huang, Mingmei Wu\*

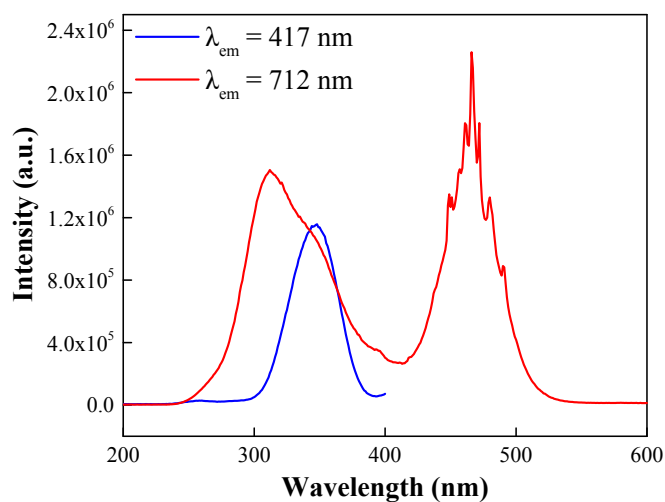

**Figure S1.** Excitation spectra of phosphor CAZO:1%B̄i³⁺,0.5%Mn⁴⁺ monitored at 417 nm and 712 nm, respectively.

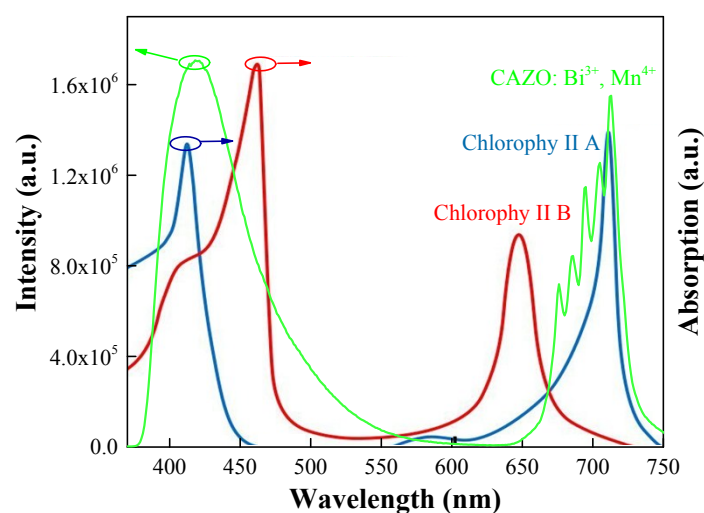

**Figure S2.** Absorption spectra of chlorophyll II A and chlorophyll II B, and emission spectrum of CAZO:0.5%B̄i³⁺,0.5%Mn⁴⁺.
